# Supplementary material for: Prognosis of hepatocellular carcinoma in hemodialysis patients treated with radiofrequency ablation: a retrospective, single-center cohort study with propensity-score matching
Source: Research Square preprint supplement (doi:10.21203/rs.3.rs-8402216/v1), 2026-01-12
Supplement: Supplementary file 1 [file 178aec777f1cb5f82d2f1716.docx]

**Additional file legends**

**Additional file 1.**

Additional file 1. Covariate balance before and after 1:2 propensity score matching between the Dialysis and Non-dialysis Groups

|  | **SMD before PSM** | **SMD after PSM** |
| --- | --- | --- |
| Age, years | 0.634 | -0.062 |
| Male, n (%) | -5.716 | -1.05 |
| HCV carrier, n (%) | -1.244 | 1.023 |
| Child-Pugh score | 0.276 | -0.097 |
| Tumor size, mm | -0.306 | -0.107 |
| Number of tumors | 0.167 | 0.237 |

SMD, standardized mean difference. HCV, Hepatitis C virus.

**Additional file 2.**

Additional file 2. Covariate balance before and after 1:2 propensity score matching between patients undergoing first RFA during CKD and the Non-dialysis Group

|  | **SMD before PSM** | **SMD after PSM** |
| --- | --- | --- |
| Age, years | 0.595 | -0.09 |
| Male, n (%) | -6.777 | 0 |
| HCV carrier, n (%) | -1.299 | 0.909 |
| Child-Pugh score | 0.054 | -0.121 |
| Tumor size, mm | -0.089 | -0.104 |
| Number of tumors | 0.097 | 0.201 |

RFA: radiofrequency ablation. CKD, chronic kidney disease. SMD, standardized mean difference. HCV: Hepatitis C virus.

**Additional file 3.**

Additional file 3. Covariate balance before and after 1:2 propensity score matching between patients undergoing first RFA after dialysis initiation and the Non-dialysis Group

|  | **SMD before PSM** | **SMD after PSM** |
| --- | --- | --- |
| Age, years | 0.595 | 0.047 |
| Male, n (%) | -4.581 | 0 |
| HCV carrier, n (%) | -1.173 | 1.809 |
| Child-Pugh score | 0.054 | 0.161 |
| Tumor size, mm | -0.089 | 0.025 |
| Number of tumors | 0.097 | 0.239 |

RFA: radiofrequency ablation. CKD, chronic kidney disease. SMD, standardized mean difference. HCV: Hepatitis C virus.

**Additional file 4.**

Kaplan–Meier analysis of overall survival in patients with HCC who underwent RFA: early era (2000–2010) vs. late era (2011–2021).
